# Supplementary material for: The Bacteriophage–Phage-Inducible Chromosomal Island Arms Race Designs an Interkingdom Inhibitor of dUTPases
Source: PubMed Central journal article supplement (PMC9927489; doi:10.1128/spectrum.03232-22), 2023-01-09
Supplement: spectrum.03232-22-s0001.pdf [file spectrum.03232-22-s0001.pdf]

## Supplementary data

### Bacteriophage-PIC1 arms race designs an interkingdom inhibitor of dUTPases

Carla Sanz-Frasquet<sup>1</sup>, J. Rafael Ciges-Tomas<sup>1</sup>, Christian Alite<sup>1</sup>, José R. Penadés<sup>2,3\*</sup>, Alberto Marina<sup>1\*</sup>.

<sup>1</sup>Instituto de Biomedicina de Valencia (IBV), CSIC and CIBER de Enfermedades Raras (CIBERER), C/ Jaime Roig 11, 46010, Valencia, Spain

<sup>2</sup>Institute of Infection, Immunity and Inflammation, College of Medical, Veterinary and Life Sciences, University of Glasgow, Glasgow, G12 8TA, UK

<sup>3</sup>MRC Centre for Molecular Bacteriology and Infection, Imperial College London, SW7 2AZ, UK.

\*Correspondence:

Alberto Marina

Instituto de Biomedicina de Valencia Consejo Superior de Investigaciones Científicas

Email: [amarina@ibv.csic.es](mailto:amarina@ibv.csic.es)

José R. Penadés

MRC Centre for Molecular Bacteriology and Infection Imperial College London

Email: [j.penades@imperial.ac.uk](mailto:j.penades@imperial.ac.uk)

## CONTENTS

| <b>Supplementary Figures</b> | page |
|------------------------------|------|
| Figure S1                    | 3    |
| Figure S2                    | 4    |
| Figure S3                    | 5    |
| Figure S4                    | 6    |
| Figure S5                    | 7    |
| Figure S6                    | 8    |
| Figure S7                    | 9    |
| Figure S8                    | 10   |
| Figure S9                    | 11   |
| Figure S10                   | 12   |

### **Supplementary Tables**

|          |    |
|----------|----|
| Table S1 | 13 |
| Table S2 | 14 |
| Table S3 | 15 |
| Table S4 | 16 |
| Table S5 | 17 |

## Supplementary Figures

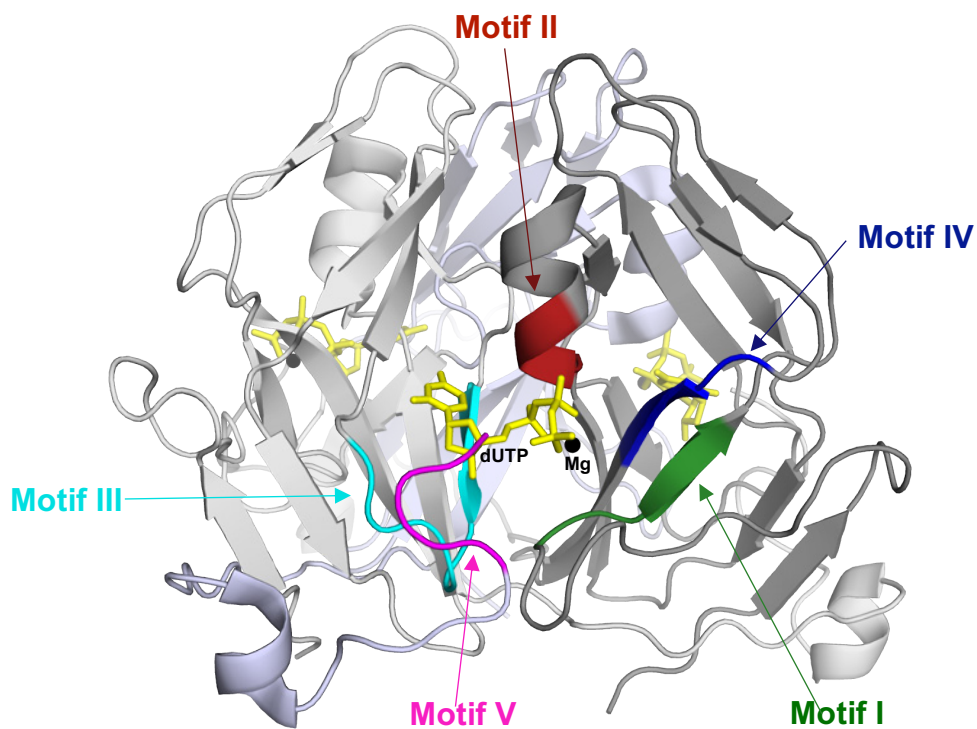

**Figure S1.** Trimeric Dut catalytic motifs. The five catalytic motifs of trimeric Duts are highlighted for one active center with differ colours in the structure of mDut-dUTP complex. Each Dut monomer is coloured in gray tones. dUTPs are shown in sticks (yellow) and the Mg ion in spheres (black).

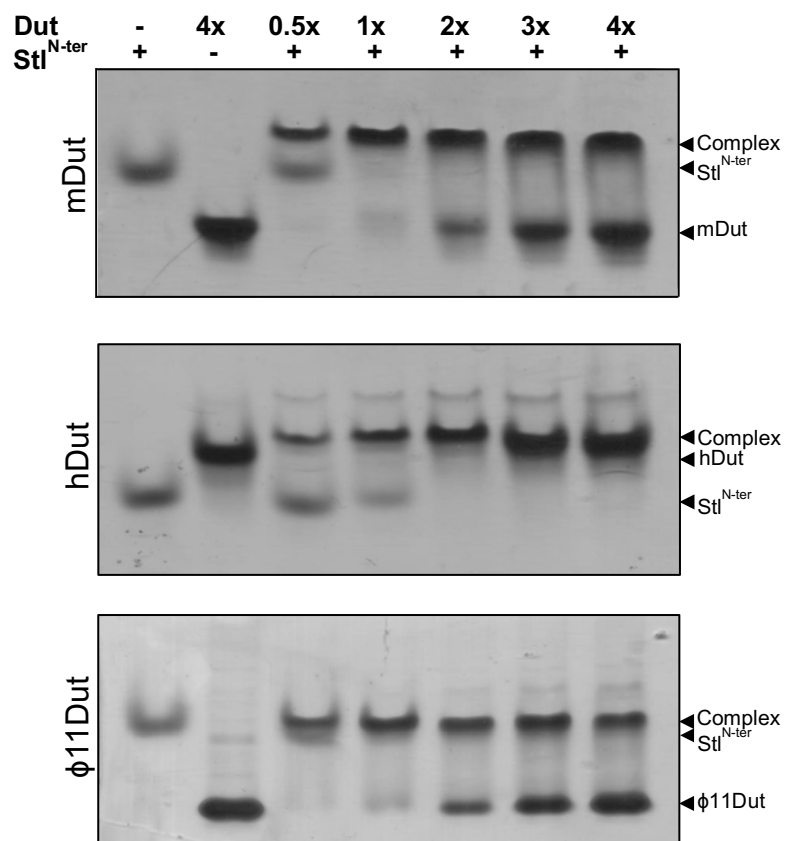

**Figure S2.** Native-PAGE analysis of Stl<sup>N-ter</sup> with mDut, hDut and φ11Dut. Increasing molar ratio concentrations of Duts were added to a fix molar concentration of Stl<sup>N-ter</sup>.

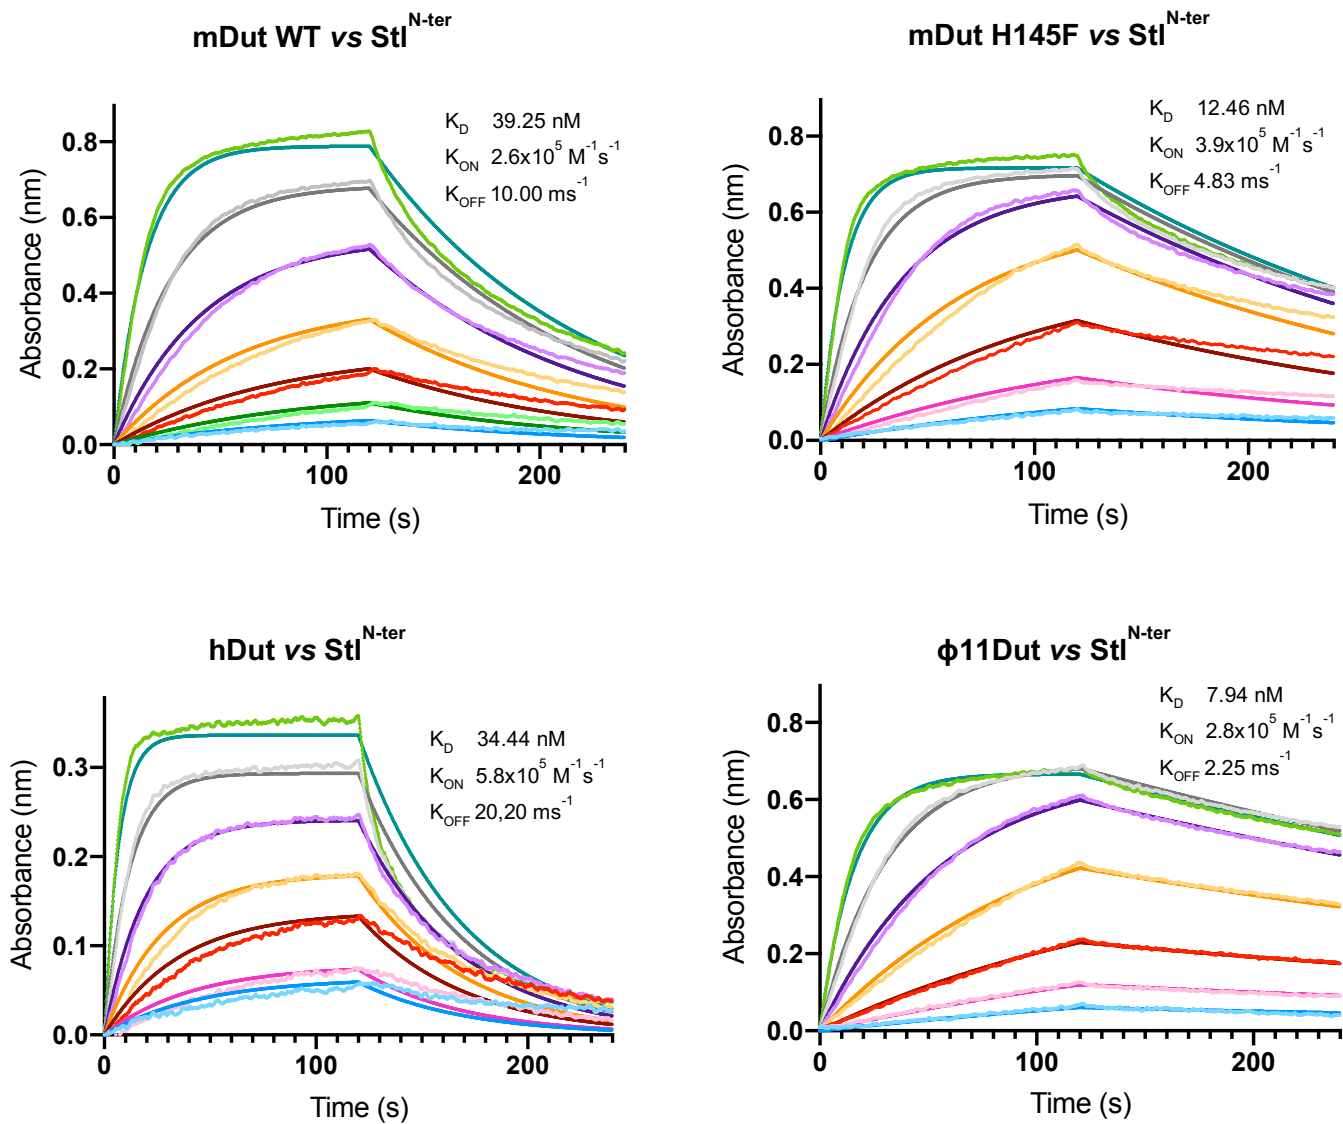

**Figure S3.** Determination of the binding kinetics of Stl<sup>N-ter</sup> with mDut, mDut H145F, hDut and ϕ11Dut by biolayer interferometry. Sensorgrams for representative assays with 7 increasing concentrations of analyte (Stl<sup>N-ter</sup>) in the steps of association (120 seconds) and dissociation (120 seconds) showing in light colors the experimental data and dark colors the fitting for a 1:1 model. The calculated binding values ( $K_D$ ,  $K_{ON}$  and  $K_{OFF}$ ) for the representative experiment are shown.

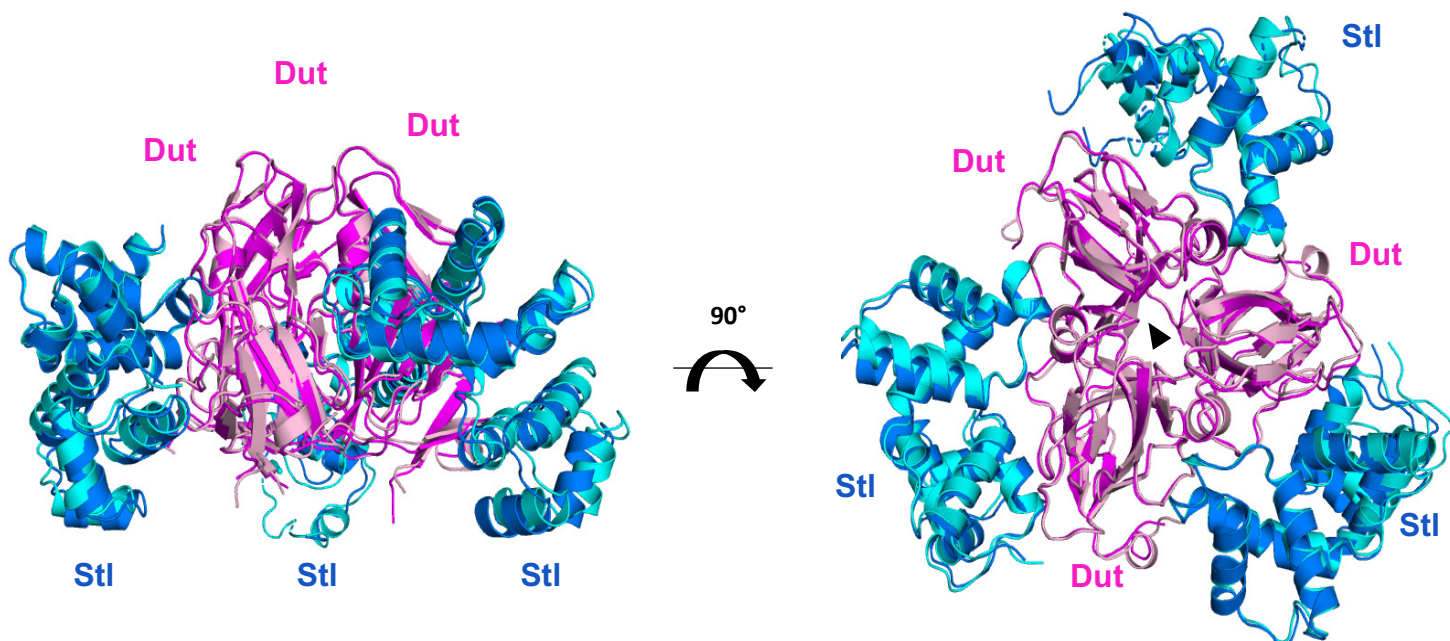

**Figure S4.** Two orthogonal views of the superposition of the two mDut-Stl<sup>N-ter</sup> complexes present in the asymmetric unit of the crystal. One complex is coloured in magenta and cyan, and the second one in lightpink and marine blue for mDut and Stl<sup>N-ter</sup>, respectively.

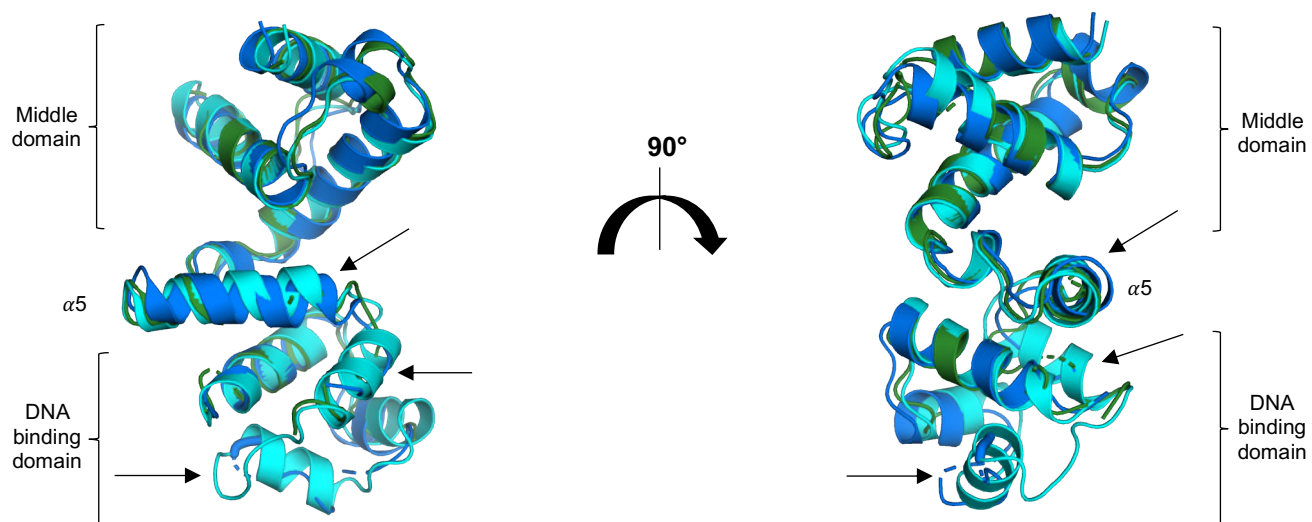

**Figure S5.** Superimposition of three-dimensional structures of Stl<sup>N-ter</sup> monomers present in the mDut-Stl<sup>N-ter</sup> complex. The asymmetric unit of the mDut-Stl<sup>N-ter</sup> crystal structure contains 2 complexes of trimeric Dut with 3 Stls. In each complex one Stl monomer shows regions of high flexibility. The two monomers with high flexible regions (cyan and green) are superimposed with one representative stable monomer (marine blue) and the regions of flexibility are indicated by arrows. Two orthogonal views are shown.

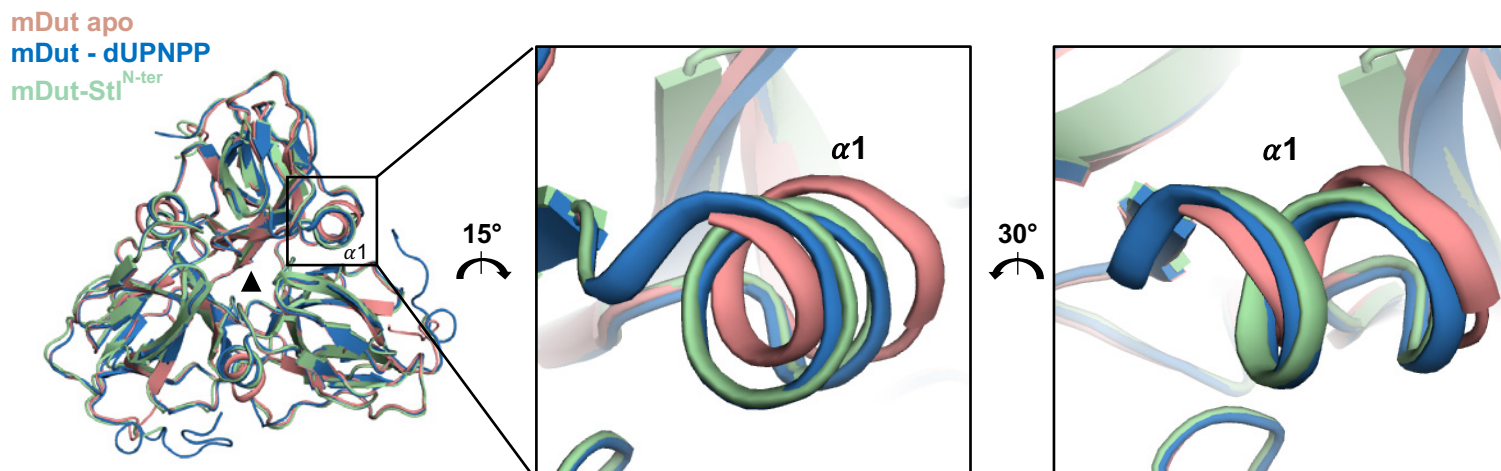

**Figure S6.** mDut trimer structure in complex with Stl is more similar to the nucleotide-bound than Apo form. Close-view of the mDut helix  $\alpha 1$  (residues 65-70) in the superimposition of the apo (salmon), nucleotide-bound (marine blue) and Stl-bound (green) structures shows a loss of the helical topology in the apo state that is retained in the nucleotide and Stl-bound states.



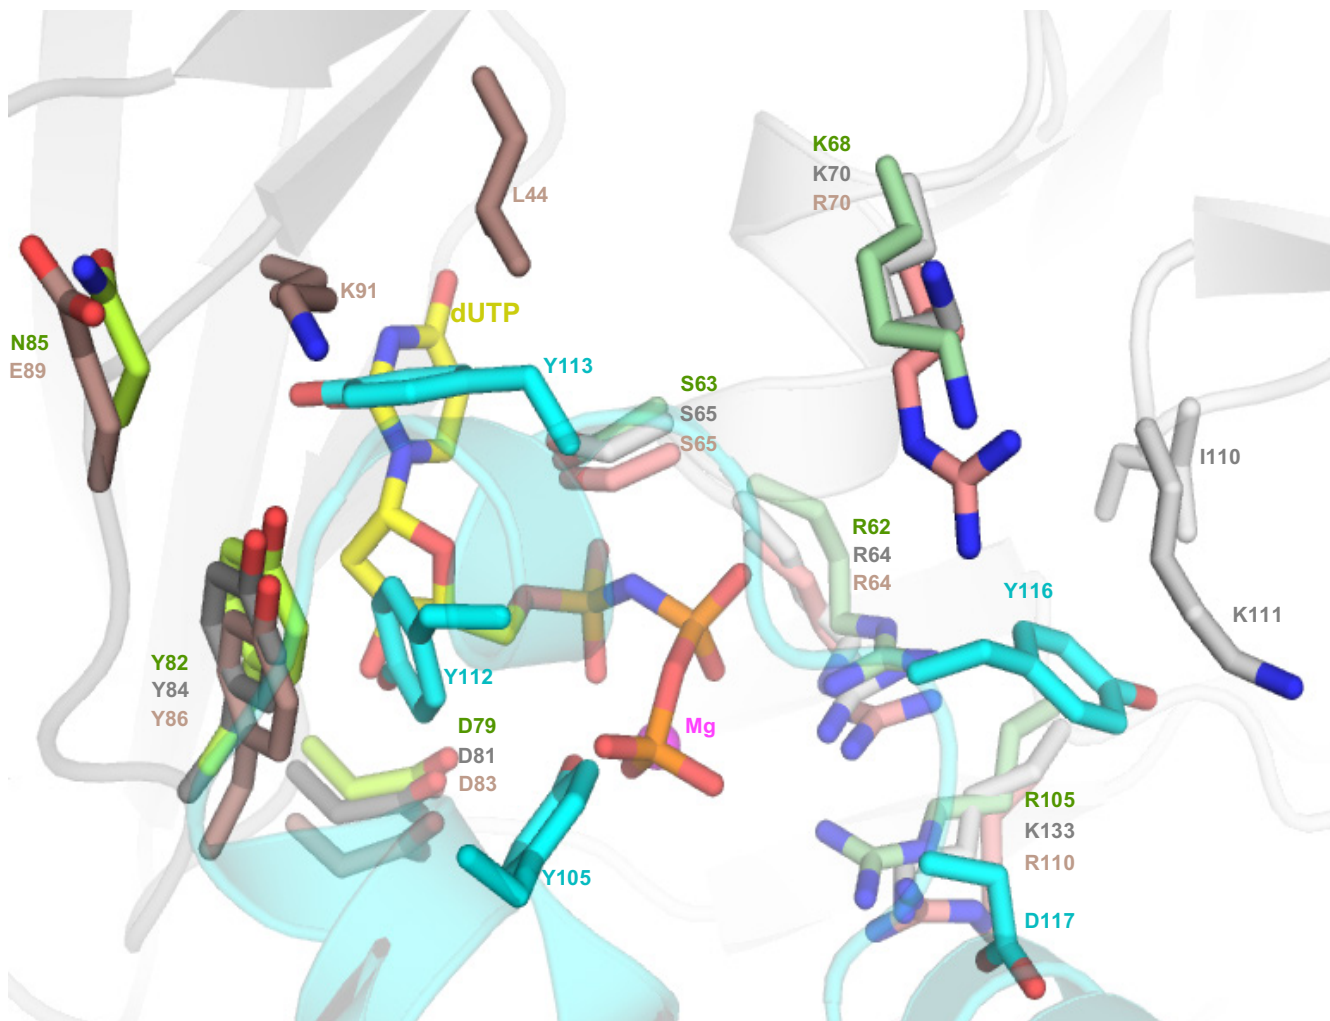

**Figure S7.** Stl mimics interactions of the dUTP substrate with trimeric Duts. Detail view of the Dut-Stl interaction region for three superimposed Stl complexes with hDut (green),  $\phi$ 11Dut (gray) and mDut (brown). A molecule of dUPNPP (substrate analogue) was placed in the active center of the Duts by superimposing the structure of  $\phi$ 11Dut – dUPNPP (PDB 4gv8) in the  $\phi$ 11Dut-Stl complex and is shown in sticks with carbon atoms in yellow and the Mg ion chelated by the nucleotide is shown as a magenta sphere. Duts and Stl (cyan) interacting residues are shown in stick and labelled.

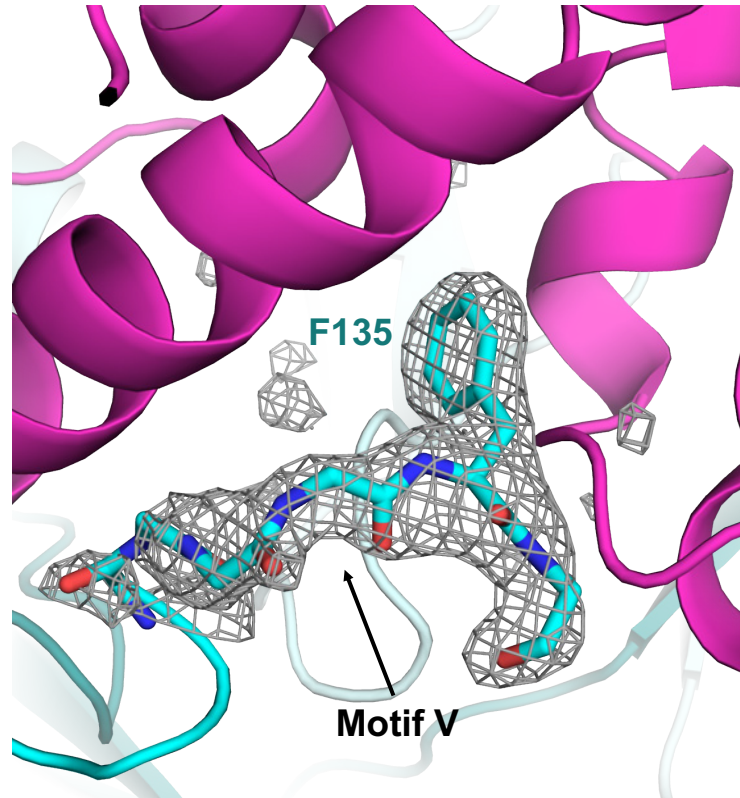

**Figure S8.** hDut motif V interaction with Stl<sup>N-ter</sup>. Fo-Fc omit map calculated for the hDut motif V (residues R130-G136) is contoured as a gray mesh at 3  $\sigma$  level over the final model of this motif represented in stick with carbon atoms coloured in cyan. hDut F135, which projects in a Stl (represent in magenta cartoon) hydrophobic pocket, is labelled.

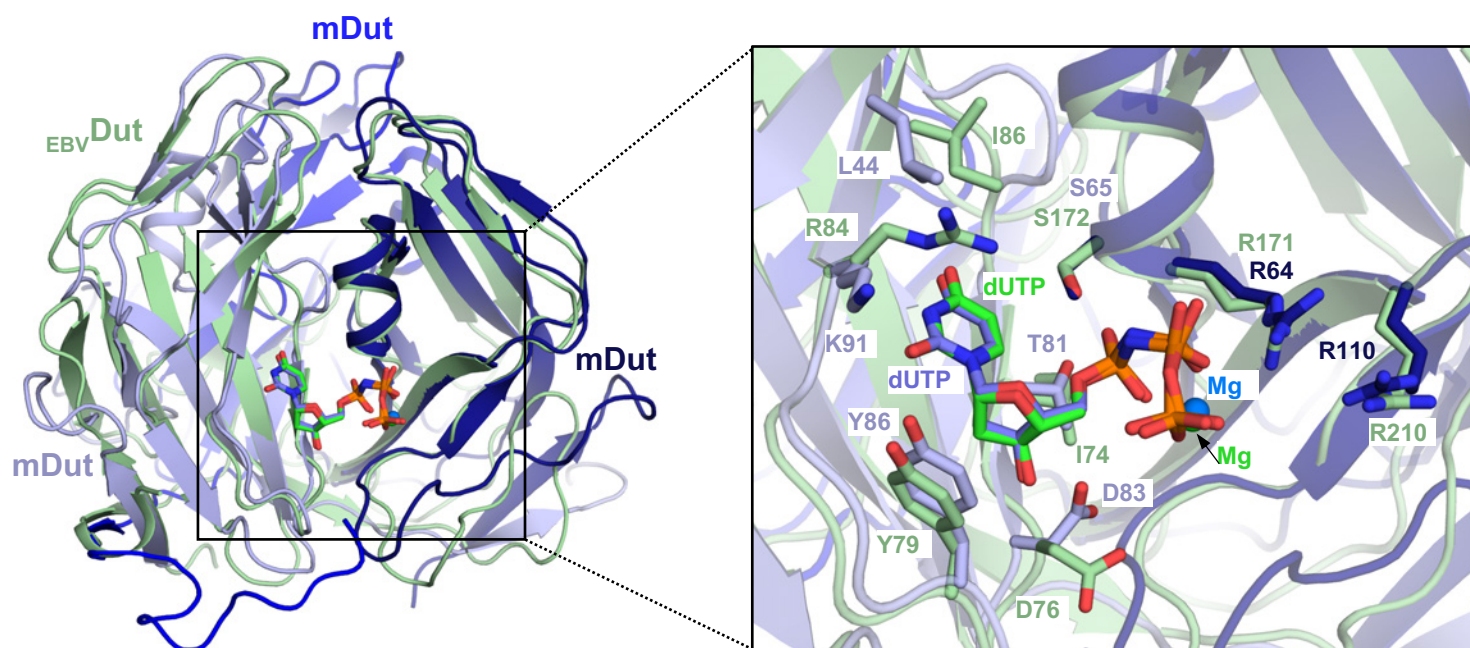

**Figure S9.** Structural comparison of monomeric and trimeric Duts. Superimposition of the substrate nucleotides on trimeric mDut and monomeric  $_{EBV}Dut$  highlights the structural conservation of the active centers for both families of Duts. *Left*, the cartoon representation of both molecules (mDut subunits is coloured in a blue tone and  $_{EBV}Dut$  in green) shows the structural alignment of secondary elements after nucleotide superimposition. *Right*, a close view of the active centers shows the identical disposition of the nucleotides and the chelated Mg ions ( n sticks and spheres, respectively) and the conservation of several catalytic residues (represented in sticks with the carbon atoms colored as the respective molecules) in both types of Duts

A

**gccatcatcatcatcatcac gag aat ctt tac ttt caa gga atg cag ttg cgc ttt gca cgt ttg tcc gaa cat gct acg gcc ccc aca  
aga ggt tca gcg cgt gcg gct ggt tat gac ctg tat tca gct tat gac tac acc atc cct ccg atg gag aag gct gta gtt aag  
act gat att cag atc gct ttg cca tcg ggt tgc tat ggc cgg gtt gcg ccg cgt agt ggg tta gcg gca aag cac ttc att gat gtg  
gga gct ggt gtg att gac gaa gat tat cgg gga aac gtg gga gtc gtc tta ttc aac ttc ggt aag gag aaa ttt gaa gta aag  
aaa ggt gac cgg ata gca cag tta atc tgc gaa aga ata ttt tat cct gaa att gag gaa gtc cag gcg ctt gac gat acc gag  
aga ggg tct gga ggg ttt ggc tcg acg ggg aaa aat taa clagcataacccttggggc**

B

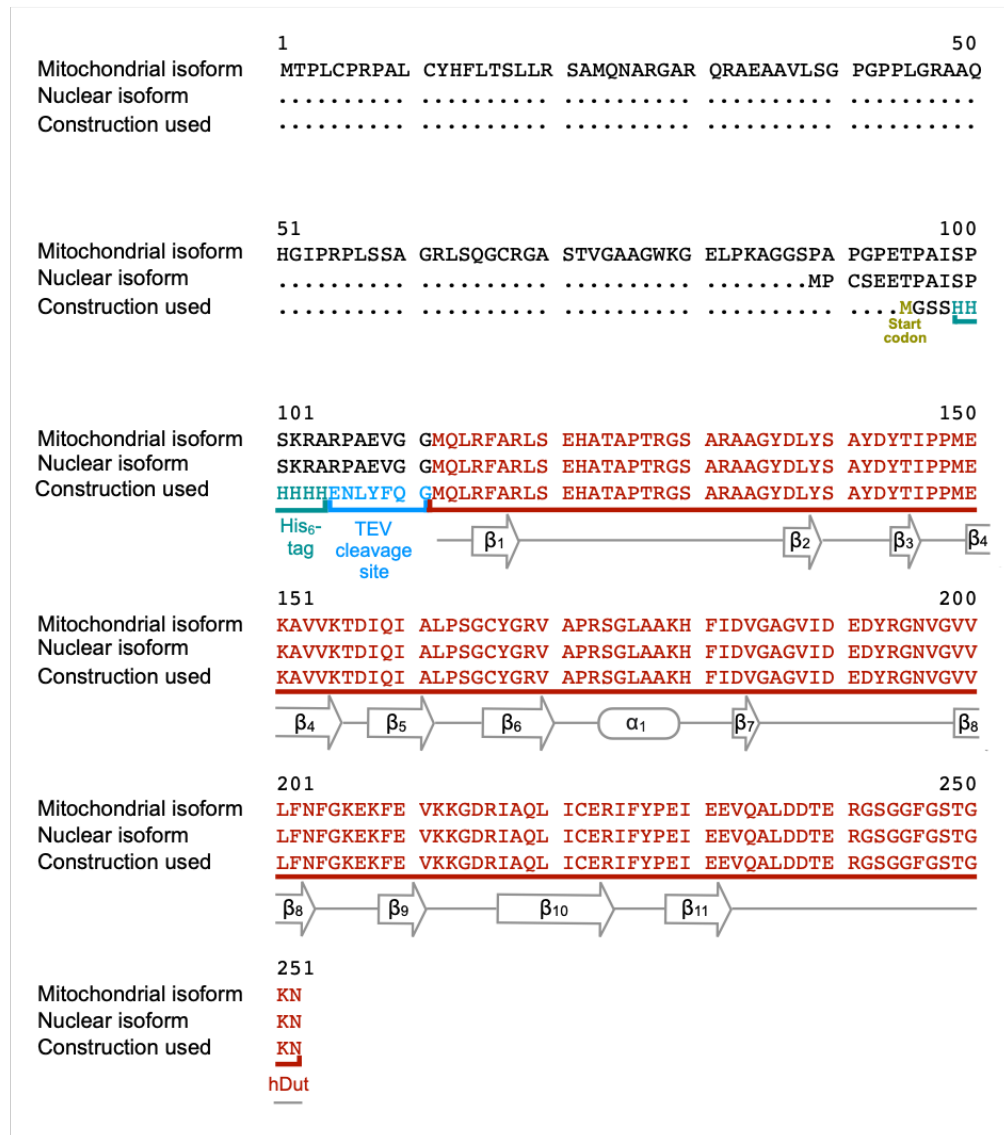

**Figure S10.** (A) Optimized DNA sequence of the human Dut used in this work (bold) flanked by the overhangs required for cloning (in blue). (B) Alignment of the protein sequences of the two human isoforms of Dut (mitochondrial and nuclear) and the protein sequence used in this work. The construction used involves a common part of both isoforms, and includes a His<sub>6</sub>-tag at the N-terminus followed by a TEV protease cleavage site. The secondary structure is also indicated. Alignment source: *Multalin*.

## Supplementary Tables

**Table S1.** Oligonucleotides used in this study.

| Plasmid    | Oligonucleotides | Sequence 5' – 3'                        |
|------------|------------------|-----------------------------------------|
| pET28a     | pET28a-Fw        | CTAGCATAACCCCTTGGG                      |
|            | pET28a-Rv        | GTGATGATGATGATGATGG                     |
|            | hDut-Fw          | GCCATCATCATCATCAC                       |
|            | hDut-Rv          | GCCCCAAGGGGTTATGCTAG                    |
| pETNKI 1.1 | mDut-Fw          | CAGGGACCCGGTGTGTCGACCACTCTGGCGATC       |
|            | mDut-Rv          | CGAGGAGAAGCCCGGTTATCACAAACTCGCATGTCCGCC |
|            | mDutH145F-Fw     | CGACGGTGGCTTTGGTTCCTCCGGCGG             |
|            | mDutH145F-Rv     | CCGCGGGATGTCGAGGCC                      |

**Table S2.** Intermolecular interactions for mDut-Stl<sup>N-ter</sup> complex.

| Stl <sup>N-ter</sup> |         |           | mDut                   |                       |           |              |     |
|----------------------|---------|-----------|------------------------|-----------------------|-----------|--------------|-----|
| Structural element   | Residue | Atom type | Structural element     | Residue               | Atom type | Distance (Å) |     |
| $\alpha 4$           | 55 Val  | CG2       | $\beta 1$              | 9 Arg                 | NH2       | 3.8          |     |
|                      |         | CG1       | L $\beta$ 8-End        | 126 Glu               | OE2       | 3.5          |     |
|                      | 56 Asn  | ND2       |                        |                       | O         | 2.8          |     |
|                      | 59 Glu  | OE1       | L $\beta$ 1 $\beta$ 2  | 18 Ser                | OG        | 3.0          |     |
| $\alpha 7$           | 102 Asn | OD1       |                        | 21 His                | NE2       | 3.6          |     |
|                      | 106 Tyr | OH        | CB                     |                       | 2.9       |              |     |
|                      |         | 107 Asn   | O                      | L $\beta$ 1 $\beta$ 2 | 24 Asp    | OD2          | 2.8 |
|                      | 87 Arg  |           |                        |                       | N         | 2.7          |     |
|                      | 88 Gly  |           |                        |                       |           | 3.7          |     |
| $\alpha 8$           | 109 Gly | N         | $\beta 6$              | 91 Lys                | NZ        | 3.5          |     |
|                      |         | O         |                        |                       |           | 3.7          |     |
|                      | 110 Asp | OD1       | 86 Tyr                 | OH                    | 3.1       |              |     |
|                      | 112 Tyr | CG        | L $\beta$ 1 $\beta$ 2  | 86 Tyr                | CE1       | 3.3          |     |
|                      |         | OH        | $\beta 5$              | 81 Thr                | O         | 3.8          |     |
|                      | 113 Tyr | O         | L $\beta$ 5 $\beta$ 6  | 83 Asp                | N         | 3.1          |     |
|                      |         |           | $\alpha 1$             | 66 Gly                |           | 3.5          |     |
|                      |         |           | L $\beta$ 4 $\alpha$ 1 | 65 Ser                | O         | 3.7          |     |
|                      |         | 114 Ser   | O                      | $\alpha 1$            | 69 Thr    | OG1          | 2.6 |
|                      |         |           |                        | $\beta 3$             | 44 Leu    | CD2          | 3.8 |
|                      |         |           |                        | $\beta 6$             | 91 Lys    | N            | 2.8 |
|                      |         |           |                        | L $\beta$ 5 $\beta$ 6 | 89 Glu    | O            | 3.5 |
|                      | 86 Tyr  | OH        | 3.5                    |                       |           |              |     |
| $\alpha 9$           | 116 Tyr | OH        | $\alpha 1$             | 70 Arg                | NE        | 3.7          |     |
|                      |         | CZ        |                        | 67 Leu                | CD1       | 3.1          |     |
|                      |         | O         | L $\beta$ 4 $\alpha$ 1 | 64 Arg                | NH2       | 3.3          |     |
|                      | 117 Asp | OD2       | $\beta 7$              | 110 Arg               | NE        | 2.8          |     |
| $\alpha 10$          | 152 Leu | O         | $\alpha 1$             | 70 Arg                | NH1       | 3.4          |     |

**Table S3.** Intermolecular interactions for hDut-Stl<sup>N-ter</sup> complex.

| Stl <sup>N-ter</sup> |         |                        | hDut                   |                       |           | Distance (Å) |
|----------------------|---------|------------------------|------------------------|-----------------------|-----------|--------------|
| Structural element   | Residue | Atom type              | Structural element     | Residue               | Atom type |              |
| $\alpha 4$           | 56 Asn  | OD1                    | $\beta 8$              | 121 Glu               | N         | 2.9          |
|                      | 59 Glu  | CD                     |                        | 119 Ile               | CG2       | 3.7          |
|                      | 66 Gly  | O                      | L $\beta$ 11-End       | 136 Gly               | N         | 3.2          |
| L $\alpha 4\alpha 5$ | 67 Ile  | CG1                    |                        | 135 Phe               | CB        | 3.9          |
|                      | 68 Pro  | CD                     | CE1                    |                       | 3.4       |              |
| $\alpha 5$           | 70 Tyr  | CB                     | L $\beta$ 1 $\beta$ 2  | 16 Thr                | CB        | 3.9          |
|                      |         | CE1                    |                        | 18 Gly                | CA        | 3.9          |
|                      | 74 Arg  | NH1                    | $\beta 2$              | 28 Tyr                | OH        | 2.9          |
| $\alpha 7$           | 98 Tyr  | CD2                    | L $\beta$ 11-End       | 135 Phe               | CZ        | 3.3          |
|                      | 99 Ser  | CB                     |                        | 133 Gly               | C         | 3.5          |
|                      | 102 Asn | ND2                    |                        | 134 Gly               | CA        | 3.8          |
|                      | 106 Tyr | CD1                    |                        | L $\beta$ 5 $\beta$ 6 | 130 Arg   | O            |
|                      |         | O                      | 81 Asp                 |                       | CB        | 3.9          |
|                      |         |                        | 83 Arg                 |                       | N         | 2.8          |
|                      | 107 Asn | OD1                    | L $\beta$ 11-End       | 84 Gly                | N         | 3.7          |
| ND2                  |         | 127 Asp                |                        | OD1                   | 3.2       |              |
| $\alpha 8$           | 109 Gly | N                      | L $\beta$ 5- $\beta$ 6 | 82 Tyr                | OH        | 3.5          |
|                      | 112 Tyr | CG                     |                        |                       | CE1       | 3.2          |
|                      |         | 113 Tyr                | OH                     | $\beta 5$             | 77 Val    | O            |
|                      | CE1     |                        | L $\beta$ 5- $\beta$ 6 | 79 Asp                | N         | 3.0          |
|                      |         |                        |                        | 82 Tyr                | OH        | 3.7          |
|                      |         |                        |                        | 85 Asn                | O         | 3.9          |
|                      |         |                        |                        | 87 Gly                | $\beta 6$ | CA           |
|                      | O       |                        | 2.6                    |                       |           |              |
|                      | OH      | $\alpha 1$             | N                      | 2.7                   |           |              |
| C                    | 64 Gly  |                        | CA                     | 3.9                   |           |              |
| 114 Ser              | OG      | L $\beta$ 4 $\alpha$ 1 | 68 Lys                 | CG                    | 3.5       |              |
| $\alpha 9$           | 116 Tyr |                        | O                      | 62 Arg                | NH1       | 2.6          |
|                      |         | OH                     | L $\beta$ 6- $\beta$ 7 | 104 Asp               | OD1       | 3.6          |
|                      | 117 Asp | OD2                    |                        | 105 Arg               | N         | 2.8          |
|                      |         |                        |                        | NH1                   | 3.0       |              |

**Table S4.** Intermolecular interactions for EBVDut-Stl<sup>N-ter</sup> model.

| Stl <sup>N-ter</sup> |         | EBVDut                    |         |
|----------------------|---------|---------------------------|---------|
| Structural element   | Residue | Structural element        | Residue |
| $\alpha 4$           | 55 Val  | L $\beta 12$ - $\beta 13$ | 118 Glu |
|                      | 56 Asn  |                           | 117 Glu |
|                      | 59 Glu  |                           | 115 Gln |
| $\alpha 5$           | 74 Arg  | L $\beta 19$ - $\beta 20$ | 210 Arg |
| $\alpha 7$           | 102 Asn | L $\beta 12$ - $\beta 13$ | 128 Tyr |
|                      | 105 Tyr | L $\beta 9$ - $\beta 10$  | 76 Asp  |
|                      | 106 Tyr |                           | 78 Gly  |
|                      | 110 Asp |                           | 80 Thr  |
|                      | 112 Tyr |                           | 84 Arg  |
|                      | 113 Tyr | $\beta 9$                 | 79 Tyr  |
|                      |         | $\alpha 1$                | 74 Iso  |
|                      |         | 172 Ser                   |         |
| $\alpha 9$           | 116 Tyr | L $\beta 16$ - $\alpha 1$ | 171 Arg |
|                      |         | $\alpha 1$                | 173 Gly |
|                      |         |                           | 174 Leu |
|                      | 117 Asp | L $\beta 19$ - $\beta 20$ | 177 Gln |
|                      |         | 210 Arg                   |         |



**Table S5.** interactions of Dut recognition residues of Stl<sup>N-ter</sup> in the complexes with mDut, hDut,  $\phi$ 11Dut and EBVDut.

| Stl <sup>N-ter</sup> | $\phi$ 11DUT | mDUT                | hDUT    | EBVDut  |
|----------------------|--------------|---------------------|---------|---------|
| 55 Val               | 149 Gln      | 126 Glu             | 121 Glu | 118 Glu |
| 56 Asn               |              |                     |         | 117 Glu |
| 59 Glu               |              | 18 Ser              | 119 Ile | 115 Gln |
| 66 Gly               |              |                     | 136 Gly |         |
| 67 Ile               |              |                     | 135 Phe |         |
| 68 Pro               |              |                     |         |         |
| 70 Tyr               | 18 Glu       |                     | 16 Thr  |         |
|                      | 20 Asn       |                     | 18 Gly  |         |
| 74 Arg               | 18 Glu       |                     | 28 Tyr  |         |
| 77 Asp               | 15 Arg       |                     |         |         |
| 98 Tyr               | 20 Asn       |                     | 135 Phe |         |
| 99 Ser               |              |                     | 133 Gly |         |
|                      |              |                     | 134 Gly |         |
| 102 Asn              | 20 Asn       | 21 His              | 130 Arg | 128 Tyr |
|                      |              |                     |         |         |
| 106 Tyr              | 21 His       | 21 His              | 81 Asp  | 78 Gly  |
|                      | 24 Asp       | 24 Asp              |         |         |
|                      | 85 His       | 87 Arg              |         |         |
| 107 Asn              |              | 88 Gly              | 84 Gly  |         |
|                      |              |                     | 127 Asp |         |
|                      |              |                     | 131 Gly |         |
| 109 Gly              | 84 Tyr       | 86 Tyr              | 82 Tyr  |         |
| 110 Asp              |              | 91 Lys              |         |         |
| 112 Tyr              | 84 Tyr       | 86 Tyr              | 82 Tyr  | 84 Arg  |
|                      | 79 Lys       | 81 Thr              | 77 Val  | 79 Tyr  |
|                      | 81 Asp       | 83 Asp              | 79 Asp  | 74 Ile  |
| 113 Tyr              | 66 Gly       | 66 Gly              |         |         |
|                      | 65 Ser       | 65 Ser              |         |         |
|                      | 69 Ser       | 69 Thr              |         |         |
|                      |              | 44 Leu              |         |         |
|                      | 89 Gly       | 91 Lys              | 87 Gly  |         |
|                      |              |                     |         |         |
|                      |              | 89 Glu              | 85 Asn  |         |
|                      | 86 Tyr       | 82 Tyr              |         |         |
| 114 Ser              | 70 Lys       | 70 Arg              | 64 Gly  |         |
|                      |              |                     | 68 Lys  |         |
| 116 Tyr              |              |                     |         | 173 Gly |
|                      |              | 67 Leu              |         |         |
|                      | 64 Arg       | 64 Arg              | 62 Arg  | 171 Arg |
|                      | 110 Ile      | Absence of motif VI |         |         |
|                      | 111 Lys      |                     |         |         |
|                      |              |                     | 104 Asp |         |
| 117 Asp              | 133 Lys      | 110 Arg             | 105 Arg | 210 Arg |
| 152 Leu              | 70 Lys       | 70 Arg              |         |         |
